# Supplementary material for: Beta-1 syntrophin (SNTB1) regulates colorectal cancer progression and stemness via regulation of the Wnt/β-catenin signaling pathway
Source: PubMed Central journal article supplement — Ann Transl Med. 2021 Jun;9(12):1016. doi: 10.21037/atm-21-2700 (PMC8267293; doi:10.21037/atm-21-2700), 2021-06
Supplement: atm-09-12-1016-supplementary.pdf [file atm-09-12-1016-supplementary.pdf]

## Supplementary

**Table S1** The basic information of 10 CRC patients for SNTB1 mRNA and protein expression analysis

| Parameters | Cases (n) | Percentage (%) |
|------------|-----------|----------------|
| Location   |           |                |
| Colon      | 5         | 50.0           |
| Rectum     | 5         | 50.0           |
| Gender     |           |                |
| Male       | 5         | 50.0           |
| Female     | 5         | 50.0           |
| Age        |           |                |
| ≤60        | 4         | 40.0           |
| >60        | 6         | 60.0           |
| Grade      |           |                |
| G1         | 0         | 0.0            |
| G2         | 10        | 100.0          |
| G3         | 0         | 0.0            |
| Stage      |           |                |
| Stage I    |           | 0.0            |
| Stage II   | 5         | 50.0           |
| Stage III  | 5         | 50.0           |
| Stage IV   | 0         | 0.0            |

CRC, colorectal cancer; SNTB1, beta-1 syntrophin.

**Table S2** The relationship between SNTB1 IHC expression level and clinical pathological characteristics in 294 patients with CRC

| Parameters                     | Cases (n) | Percentage (%) |
|--------------------------------|-----------|----------------|
| Gender                         |           |                |
| Male                           | 15        | 60.0           |
| Female                         | 10        | 40.0           |
| Age                            |           |                |
| <60                            | 9         | 36.0           |
| ≥60                            | 14        | 56.0           |
| NA                             | 2         | 8.0            |
| Histologic                     |           |                |
| Adenomatous polyp with IN      | 4         | 16.0           |
| Tubular adenoma with IN        | 11        | 44.0           |
| Villioistublar adenoma with IN | 10        | 40.0           |

SNTB1, beta-1 syntrophin; IHC, immunohistochemistry; CRC, colorectal cancer; NA, not available; IN, intraepithelial neoplasia.

**Table S3** The basic information of 70 patients with benign colorectal lesions for SNTB1 IHC staining analysis

| Parameters       | Cases (n) | Percentage (%) |
|------------------|-----------|----------------|
| Gender           |           |                |
| Male             | 61        | 71.8           |
| Female           | 24        | 28.2           |
| Age              |           |                |
| <60              | 50        | 58.8           |
| ≥60              | 35        | 41.2           |
| Type of diseases |           |                |
| Adenoma          | 42        | 49.4           |
| Inflammation     | 10        | 11.8           |
| Polyp            | 26        | 30.6           |
| Other            | 7         | 8.2            |

Adenoma includes tubular adenoma and villioistublar adenoma. Inflammation includes ulceration, chronic inflammation and abscess. Polyp includes adenomatous polyp, inflammatory polyp, inflammatory hyperplastic polyp, juvenile polyp and hyperplastic polyp. Other includes multiple diverticulum and congenital megacolon. SNTB1, beta-1 syntrophin.

**Table S4** The basic information of 30 patients with colorectal precancerous lesions for SNTB1 immunohistochemical staining analysis

| Parameters       | Number of cases | SNTB1 IHC expression |      | P values |
|------------------|-----------------|----------------------|------|----------|
|                  |                 | Low                  | High |          |
| Gender           |                 |                      |      |          |
| Female           | 116             | 58                   | 58   | 1.00     |
| Male             | 162             | 81                   | 81   |          |
| Age              |                 |                      |      |          |
| <60              | 138             | 70                   | 68   | 0.999    |
| ≥60              | 136             | 69                   | 67   |          |
| Grade            |                 |                      |      |          |
| G1–G2            | 213             | 109                  | 104  | 0.0282*  |
| G3               | 17              | 4                    | 13   |          |
| T classification |                 |                      |      |          |
| T1–2             | 65              | 39                   | 26   | 0.0799   |
| T3–4             | 200             | 95                   | 105  |          |
| N classification |                 |                      |      |          |
| N0               | 160             | 88                   | 72   | 0.0345*  |
| N1–2             | 109             | 46                   | 63   |          |
| M classification |                 |                      |      |          |
| M0               | 227             | 120                  | 107  | 0.0440*  |
| M1               | 51              | 19                   | 32   |          |
| Stage            |                 |                      |      |          |
| I–II             | 138             | 79                   | 59   | 0.0145*  |
| III–IV           | 130             | 55                   | 75   |          |

\*, P<0.05. SNTB1, beta-1 syntrophin; IHC, immunohistochemistry.

**Table S5** A list of primers used in the reactions for clone PCR

| Gene                 | Sequence (5'-3')                                           |
|----------------------|------------------------------------------------------------|
| <i>shSNTB1-1#-up</i> | CCGGGCAAGGGATTGAAACACATCTCTCGAGAGATGTGTTTCAATCCCTTGCTTTTTG |
| <i>shSNTB1-1#-dn</i> | AATTCAAAAGCAAGGGATTGAAACACATCTCTCGAGAGATGTGTTTCAATCCCTTGCT |
| <i>shSNTB1-2#-up</i> | CCGGGGATTGAAACACATCTCTTCACTCGAGTGAAGAGATGTGTTTCAATCCTTTTTG |
| <i>shSNTB1-2#-dn</i> | AATTCAAAAGGATTGAAACACATCTCTTCACTCGAGTGAAGAGATGTGTTTCAATCCT |

PCR, polymerase chain reaction.

**Table S6** A list of primers used in the reactions for real-time RT-PCR

| Gene name      | Region  | Sequence                       |
|----------------|---------|--------------------------------|
| <i>GAPDH</i>   | Forward | 5'-GCACCGTCAAGGCTGAGAAC-3'     |
|                | Reverse | 5'-TGGTGAAGACGCCAGTGGA-3'      |
| <i>SNTB1</i>   | Forward | 5'-CTGGAAGTGAAGTACATGCGAG-3'   |
|                | Reverse | 5'-GGGATGCTTTTCCGGTCTCTG-3'    |
| <i>CD133</i>   | Forward | 5'-TTTGGATTCATATGCCTTCTGT-3'   |
|                | Reverse | 5'-CCATTGGCATTCTCTTTGAA-3'     |
| <i>LGR5</i>    | Forward | 5'-CTCCCAGGTCTGGTGTGTTG-3'     |
|                | Reverse | 5'-GAGGTCTAGGTAGGAGGTGAAG-3'   |
| <i>EpCAM</i>   | Forward | 5'-AATCGTCAATGCCAGTGACTT-3'    |
|                | Reverse | 5'-TCTCATCGCAGTCAGGATCATAA-3'  |
| <i>ALDH1A1</i> | Forward | 5'-ACAGTGGTTGTCAAACCAGCAGAG-3' |
|                | Reverse | 5'-TGTAGGCCCATACCAGGAACAATA-3' |
| <i>POU5F1</i>  | Forward | 5'-TGAGTAGTCCCTTCGCAAGC-3'     |
|                | Reverse | 5'-GAGAAGGCGAAATCCGAAG-3'      |
| <i>KLF4</i>    | Forward | 5'-CCCCGTGTGTTTACGGTAGT-3'     |
|                | Reverse | 5'-GAGTTCCCATCTCAAGGCAC-3'     |

RT-PCR, reverse transcription-polymerase chain reaction.
